# Supplementary material
Source: Springer Nature journal article supplement (https://www.springermedizin.de/resource/supplementary/13054_2011_9560_MOESM4_ESM.pdf/9706458)

**a**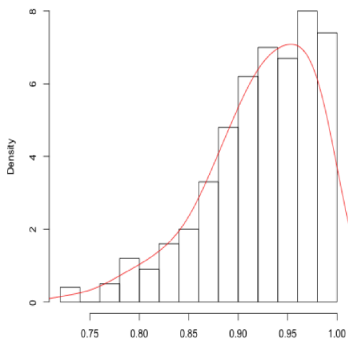**AUC MI Vs HC****b**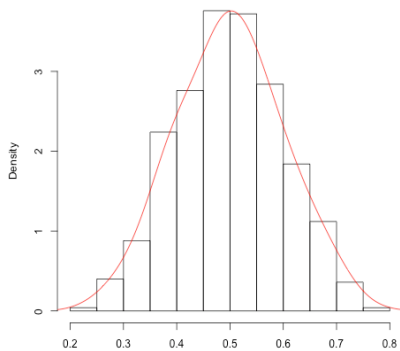**Randomised diagnosis (MI & HC)****c**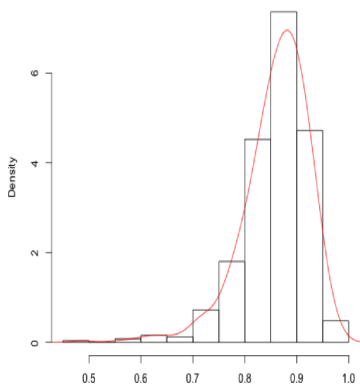**AUC MI Vs HC****d**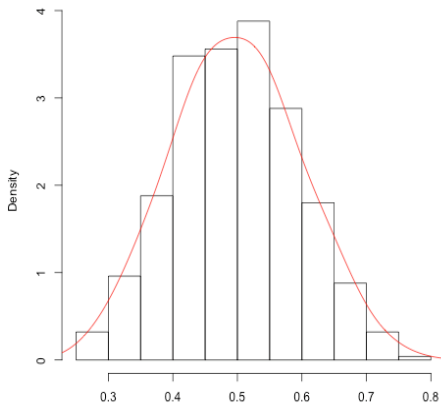**Randomised diagnosis (MI & HC)**

Supplement: MOESM4 [file 9706458]
